# Supplementary material for: Relationship between Mitochondrial Quality Control Markers, Lower Extremity Tissue Composition, and Physical Performance in Physically Inactive Older Adults
Source: MDPI journal article supplement (doi:10.3390/cells12010183), 2023-01-02
Supplement: s1 [file s1]

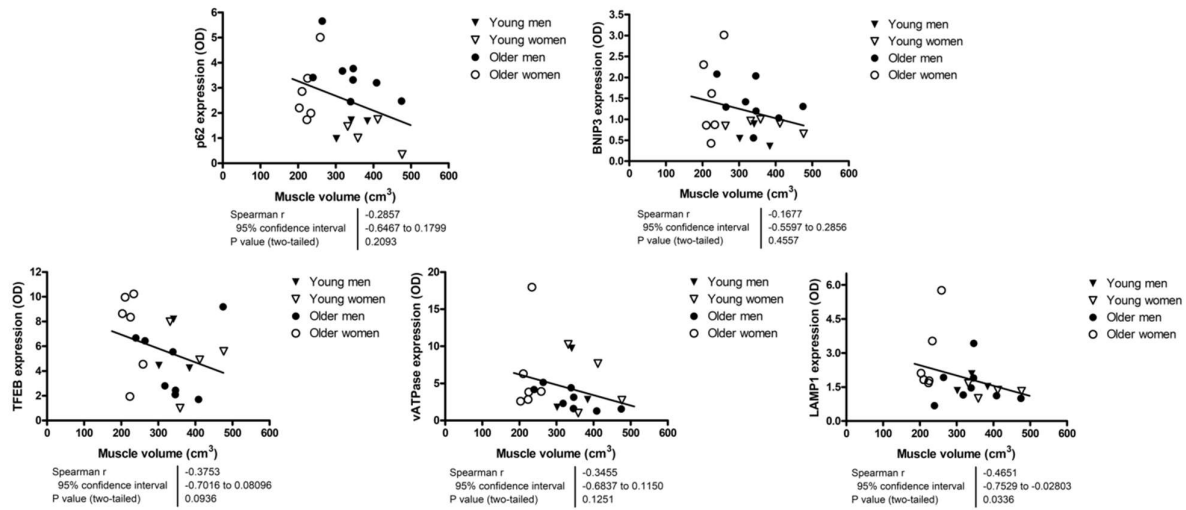

**Figure S1. Correlation analyses between autophagy, mitophagy, and lysosomal markers and lower extremity muscle volume.** Correlations were explored via Spearman's statistics. The content of protein markers is expressed as optical density (OD) and is reported in arbitrary units. Abbreviation: BNIP3, BCL2/adenovirus E1B 19 kDa protein-interacting protein 3; LAMP1, lysosomal-associated membrane protein 1; TFEB, transcription factor EB; vATPase, vacuolar-type ATPase.

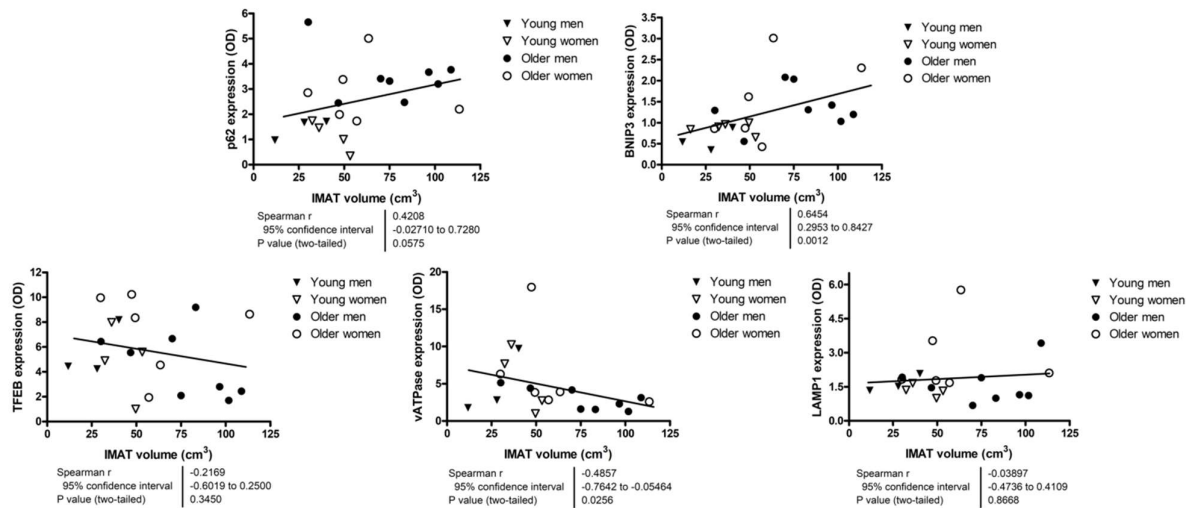

**Figure S2. Correlation analyses between autophagy, mitophagy, and lysosomal markers and lower extremity intermuscular adipose tissue (IMAT) volume.** Correlations were explored via Spearman's statistics. The content of protein markers is expressed as optical density (OD) and is reported in arbitrary units. Abbreviation: BNIP3, BCL2/adenovirus E1B 19 kDa protein-interacting protein 3; LAMP1, lysosomal-associated membrane protein 1; TFEB, transcription factor EB; vATPase, vacuolar-type ATPase.
